# Supplementary material for: Tuning chemical compositions of bimetallic AuPd catalysts for selective catalytic hydrogenation of halogenated quinolines
Source: Royal Society of Chemistry journal article supplement (doi:10.1039/c6ta09916e), 2017-01-01
Supplement: c6ta09916e1.pdf [file c6ta09916e1.pdf]

**Tuning chemical compositions of bimetallic AuPd catalysts for  
selective catalytic hydrogenation of halogenated quinolines**

*Sai Zhang,<sup>a</sup> Zhaoming Xia,<sup>a</sup> Ting Ni,<sup>a</sup> Huan Zhang,<sup>a</sup> Chao Wu<sup>a</sup> and Yongquan Qu<sup>\*a</sup>*

*<sup>a</sup> Frontier Institute of Science and Technology and State Key Laboratory for  
Mechanical Behavior of Materials, Xi'an Jiaotong University, Xi'an, 710049, China*

*\* E-mail: [yongquan@mail.xjtu.edu.cn](mailto:yongquan@mail.xjtu.edu.cn)*

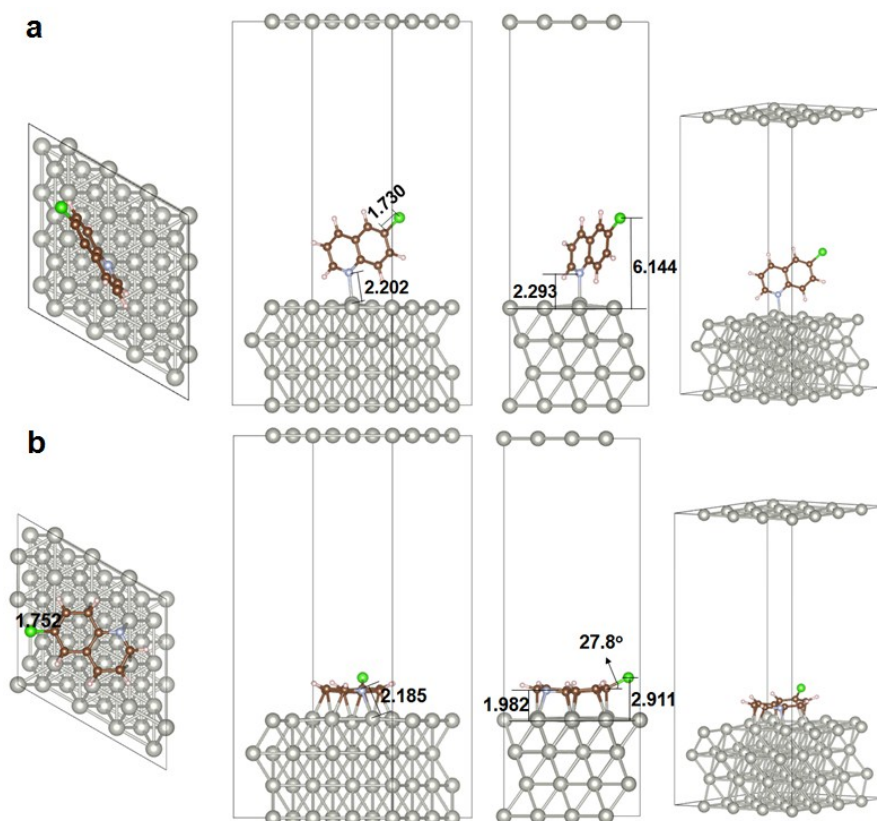

**Figure S1.** Summary of the adsorption configuration of 6-chloroquinoline molecule on Pd (111) crystal face: (a) Tilted configuration; (b) Flat configuration.

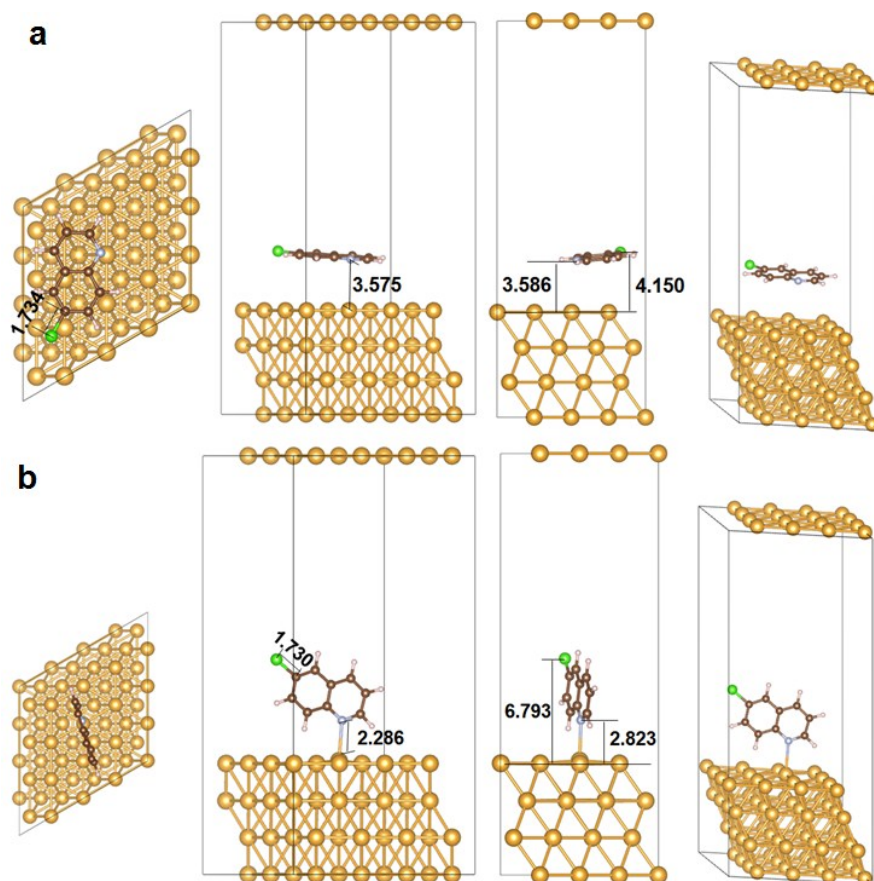

**Figure S2.** Summary of the adsorption configuration of 6-chloroquinoline molecule on Pd (111) crystal face: (a) Flat configuration; (b) Tilted configuration.

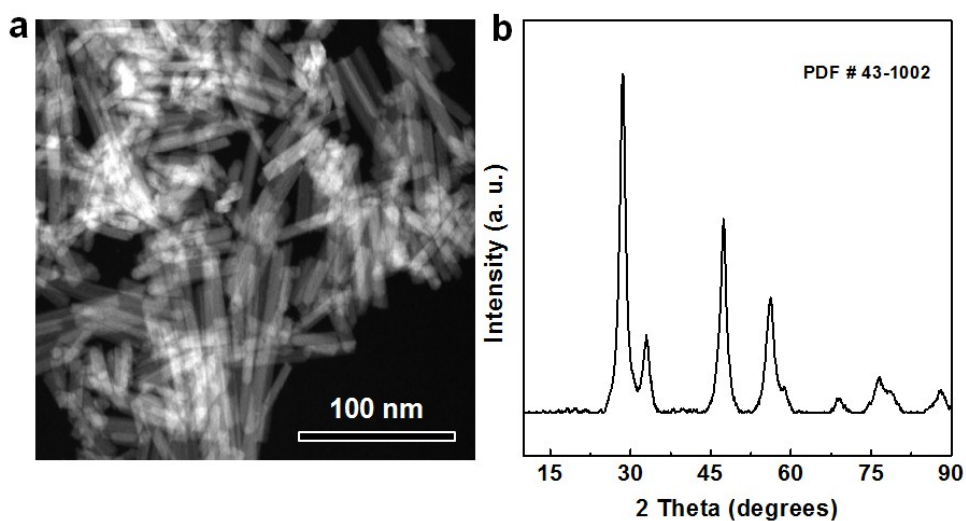

**Figure S3.** Structure characterizations of nanorods  $\text{CeO}_2$ . (a) Dark field TEM image and (b) XRD spectrum of nanorods  $\text{CeO}_2$ .

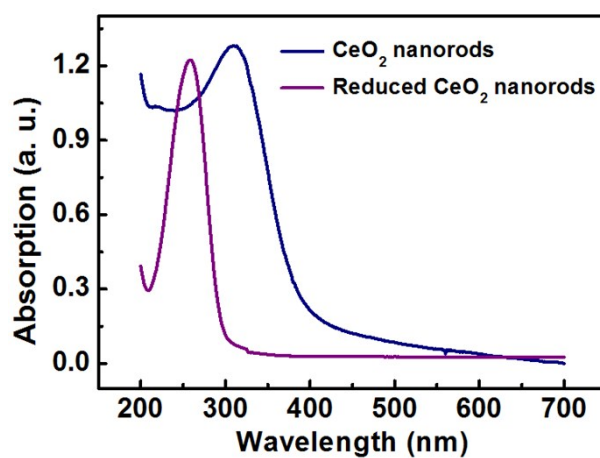

**Figure S4.** UV-vis absorption spectra of as-synthesized  $\text{CeO}_2$  nanorods and the reduced  $\text{CeO}_2$  nanorods by ascorbic acid.

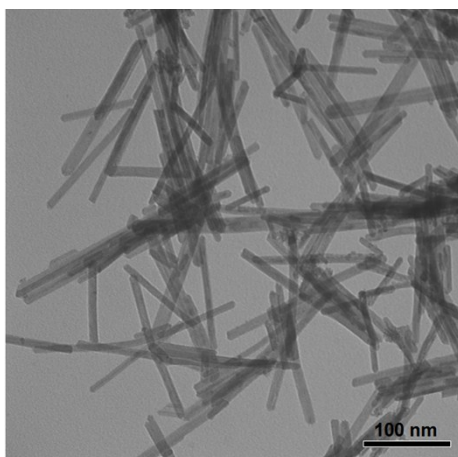

**Figure S5.** TEM image of CeO<sub>2</sub> nanorods after the chemical reduction by ascorbic acid.

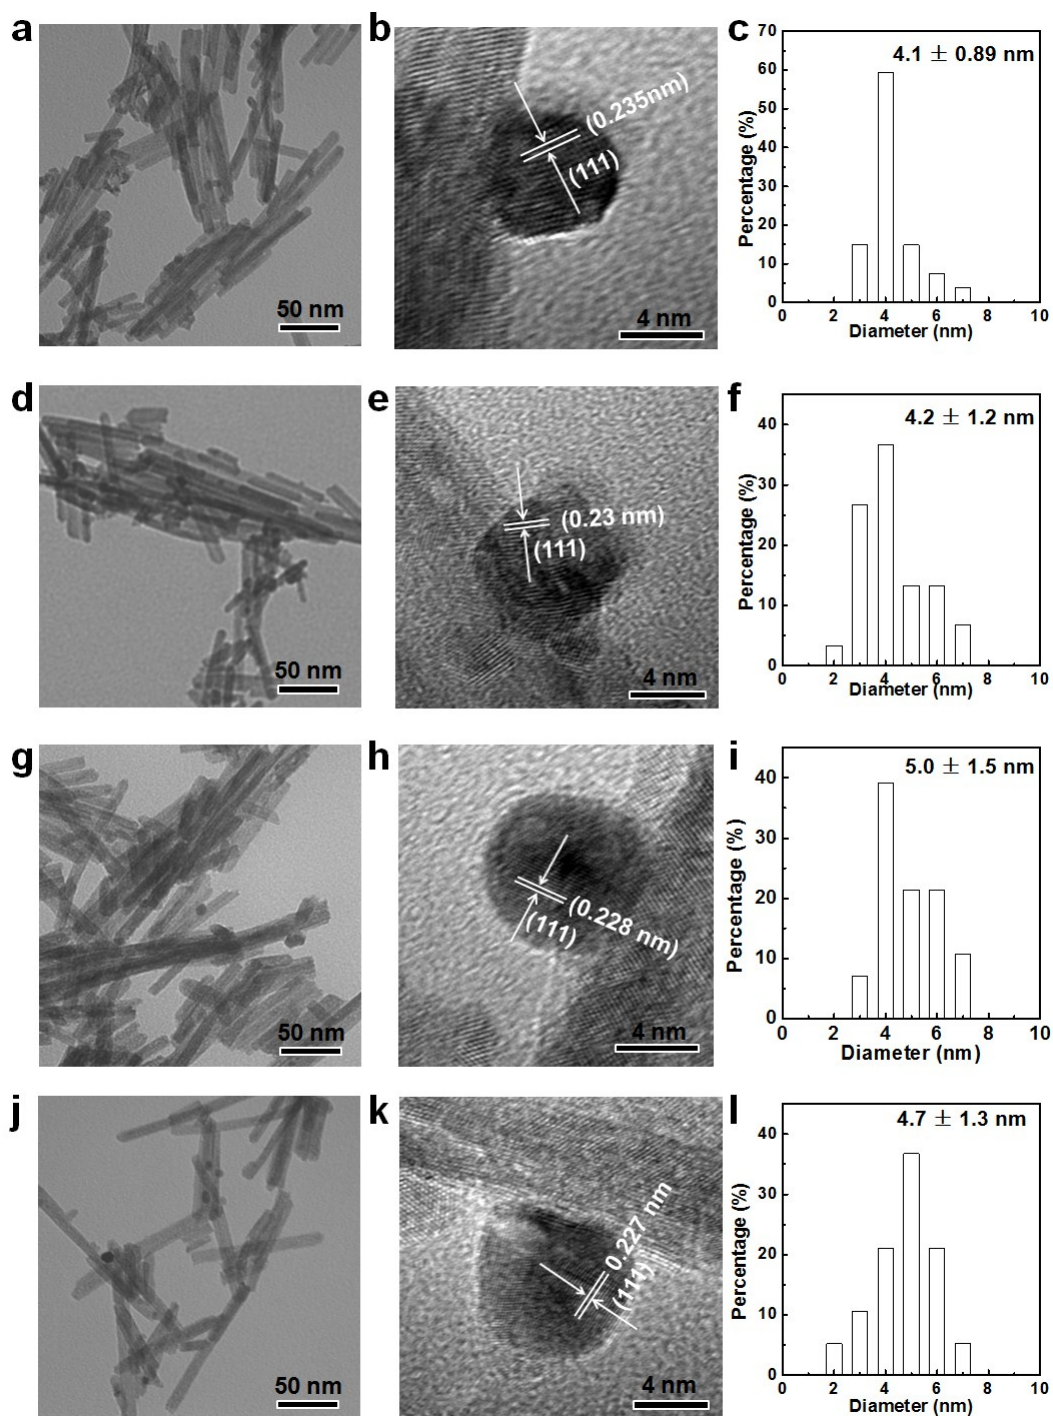

**Figure S6.** TEM images of (a)  $\text{Au}_{0.93}\text{Pd}_{0.07}/\text{CNR}$ , (b)  $\text{Au}_{0.75}\text{Pd}_{0.25}/\text{CNR}$ , (c)  $\text{Au}_{0.4}\text{Pd}_{0.6}/\text{CNR}$ , (d)  $\text{Au}_{0.25}\text{Pd}_{0.75}/\text{CNR}$  catalysts. Size distributions of all catalyst are shown in inset.



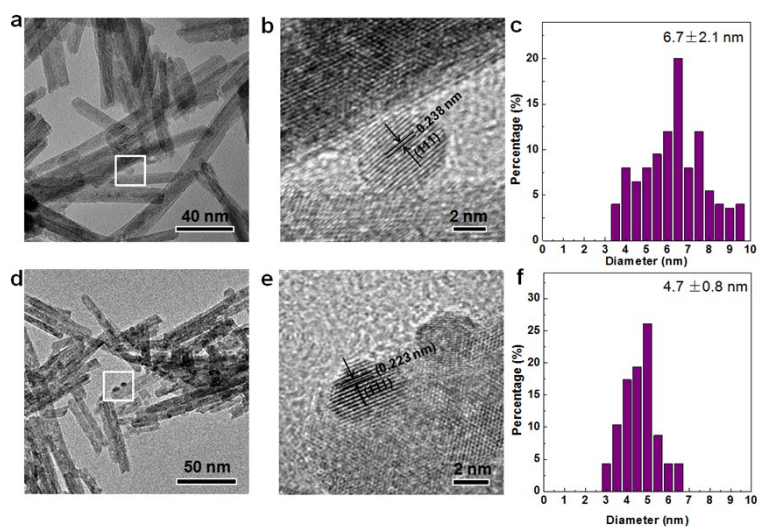

**Figure S7.** The Au/CNR catalyst: (a) TEM image, (b) HR-TEM image and (c) Size distribution of Au particles. The Pd/CNR catalyst: (d) TEM image, (e) HR-TEM image and (f) Size distribution of Pd particles.

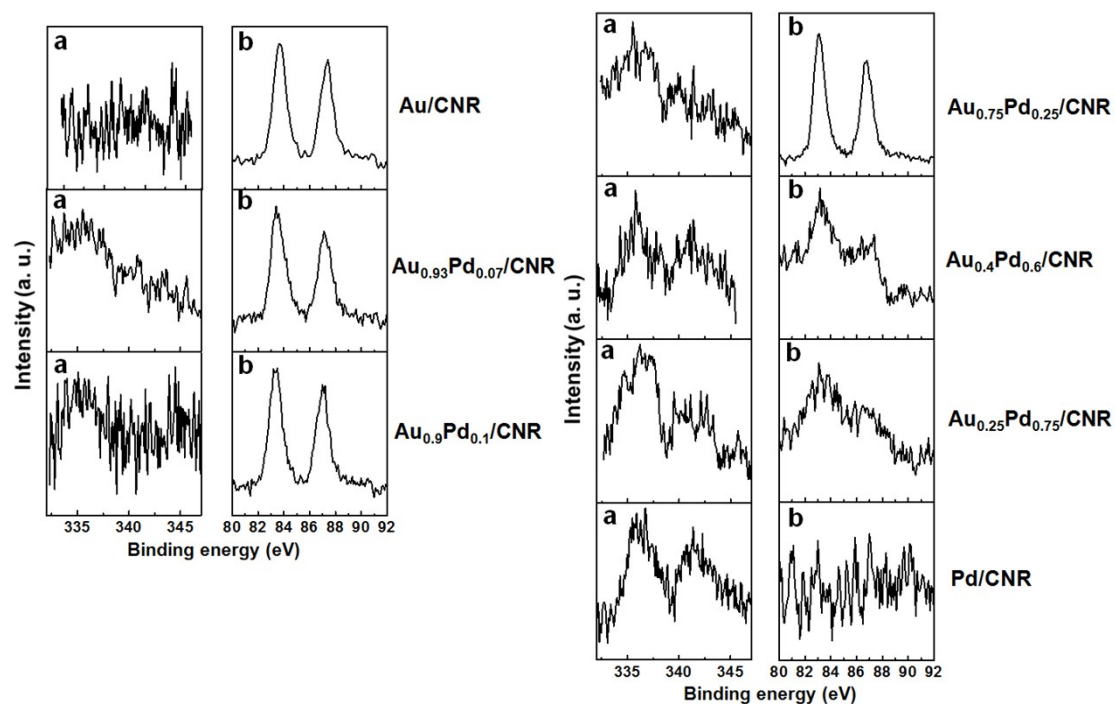

**Figure S8.** XPS spectrum of (a) Pd and (b) Au for various Au<sub>x</sub>Pd<sub>1-x</sub>/CNR catalysts.

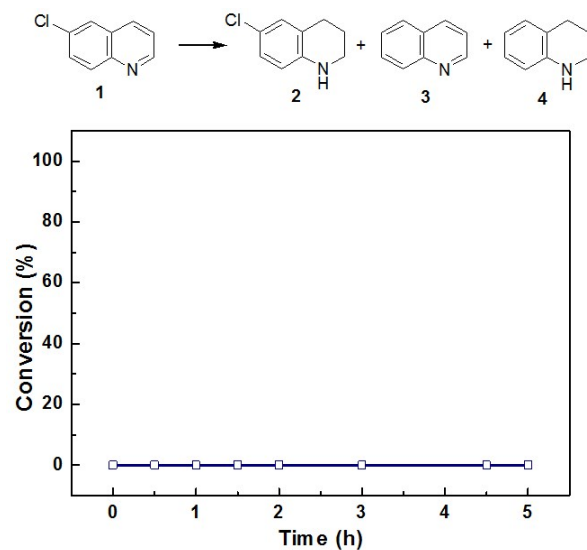

**Figure S9.** Time course of conversion of 6-chloroquinoline catalyzed by the Au/CNR catalyst. **Reaction conditions:** 6-chloroquinoline (0.2 mmol), Au/CNR catalysts (5 mg), toluene (2 mL), 100 °C and hydrogen pressure (2 MPa). Obviously, the Au/CNR catalysts exhibited no catalytic activity for hydrogenation of 6-chloroquinoline.

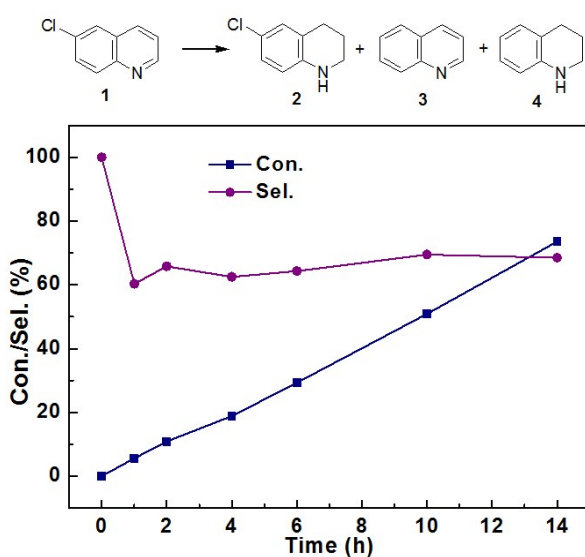

**Figure S10.** Catalytic performance of the Lindlar catalyst: Time course of conversion of 6-chloroquinoline (1) and selectivity of 6-chloro-1,2,3,4-tetrahydroquinoline (2). **Reaction conditions:** 0.2 mmol of 6-chloroquinoline, 10 mg of catalyst, 2 mL of toluene, 100 °C and 2 MPa H<sub>2</sub> pressure.



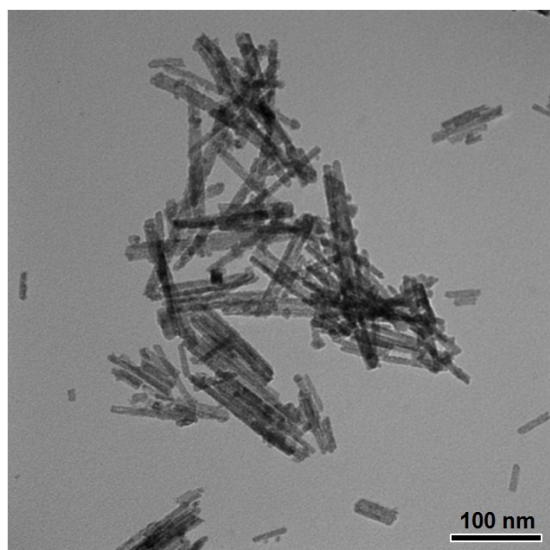

**Figure S11.** TEM image of the spent  $\text{Au}_{0.9}\text{Pd}_{0.1}/\text{CNR}$  catalysts.

**Table S1.** Summary of the selectivity or yield for the hydrogenation of functionalized quinolines in previously reported.

| Entry | Catalyst                                              | Substrates                                                                        | Products                                                                           | Selectivity/yield (%) |
|-------|-------------------------------------------------------|-----------------------------------------------------------------------------------|------------------------------------------------------------------------------------|-----------------------|
| 1     | Rh nanoparticles                                      | 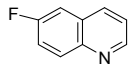 |  | 73 <sup>1</sup>       |
| 2     | Au/TiO <sub>2</sub>                                   |  |  | 100 <sup>2</sup>      |
| 3     | N <sup>-</sup> graphene modified cobalt nanoparticles |  |  | 81 <sup>3</sup>       |
| 4     | Co nanoparticles                                      |  |   | 0 <sup>4</sup>        |

**Table S2.** Optimization of the reaction conditions for hydrogenation of 6-chloroquinoline.

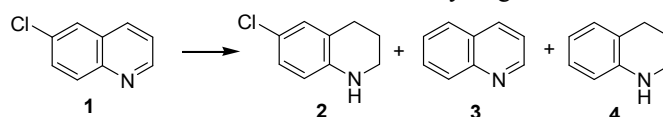

| Entry | Temperature (°C) | Pressure (MPa) | Solvent            | Time (h) | Con. (%) | Sel. (%) |      |      |
|-------|------------------|----------------|--------------------|----------|----------|----------|------|------|
|       |                  |                |                    |          |          | 2        | 3    | 4    |
| 1     | 90               | 2              | H <sub>2</sub> O   | 3        | 60.5     | 80.1     | 46.9 | 23.2 |
| 2     | 90               | 2              | CH <sub>3</sub> CN | 3        | 19.5     | 53.4     | 41.5 | 5    |
| 3     | 90               | 2              | THF                | 3        | 20.9     | 86.1     | 11.1 | 2.8  |
| 4     | 90               | 2              | n-hexane           | 3        | 66.9     | 78.9     | 12.3 | 7.9  |
| 5     | 90               | 2              | Toluene            | 3        | 74.3     | 82.6     | 13.6 | 3.8  |
| 6     | 100              | 2              | Toluene            | 3        | 81.0     | 89.6     | 5.6  | 7.8  |
| 7     | 100              | 3              | Toluene            | 3        | 93.8     | 84.0     | 9.1  | 6.9  |
| 8     | 100              | 1              | Toluene            | 3        | 65.6     | 89.9     | 6.2  | 6.9  |

**Reaction conditions:** Au<sub>0.9</sub>Pd<sub>0.1</sub>/CNR (5 mg), 6-chloroquinoline (0.2 mmol) and solvent (2 mL).

## References

- (1) Karakulina, A.; Gopakumar, A.; Akcok, I.; Roulier, B. L.; LaGrange, T.; Katsyuba, S. A.; Das, S.; Dyson, P. J. *Angew. Chem. Int. Ed.* **2016**, *55*, 292.
- (2) Ren, D.; He, L.; Yu, L.; Ding, R. S.; Liu, Y. M.; Cao, Y.; He, H. Y.; Fan, K. *N. J. Am. Chem. Soc.* **2012**, *134*, 17592.
- (3) Chen, F.; Surkus, A. E.; He, L.; Pohl, M. M.; Radnik, J.; Topf, C.; Junge, K.; Beller, M. *J. Am. Chem. Soc.* **2015**, *137*, 11718.
- (4) Nador, F.; Moglie, Y.; Vitale, C.; Yus, M.; Alonso, F.; Radivoy, G. *Tetrahedron* **2010**, *66*, 4318.
